# Supplementary material
Source: PubMed Central journal article supplement (PMC5242343)
Supplement: NIHMS840409-supplement-Supplemental.pdf [file NIHMS840409-supplement-Supplemental.pdf]

## Supporting Materials for

# Man-HA-MnO<sub>2</sub> Nanoparticles Enhance Chemotherapy Response by Priming Tumor-Associated Macrophages toward M1-like Macrophages and Attenuating Tumor Hypoxia

Manli Song<sup>1,#</sup>, Ting Liu<sup>1,#,\*</sup>, Changrong Shi<sup>1</sup>, Xiangzhong Zhang<sup>1,\*</sup>, Xiaoyuan Chen<sup>2,\*</sup>

<sup>1</sup> State Key Laboratory of Molecular Vaccinology and Molecular Diagnostics & Center for Molecular Imaging and Translational Medicine, School of Public Health, Xiamen University, Xiamen, 361102, China.

<sup>2</sup> Laboratory of Molecular Imaging and Nanomedicine, National Institute of Biomedical Imaging and Bioengineering, National Institutes of Health, Bethesda, MD 20892

\* Address correspondence to [tingliu20072008@yahoo.com](mailto:tingliu20072008@yahoo.com) (Ting Liu), [zhangxzh@xmu.edu.cn](mailto:zhangxzh@xmu.edu.cn) (Xiangzhong Zhang), [shawn.chen@nih.gov](mailto:shawn.chen@nih.gov) (Xiaoyuan Chen)

# These authors contributed equally on this work.

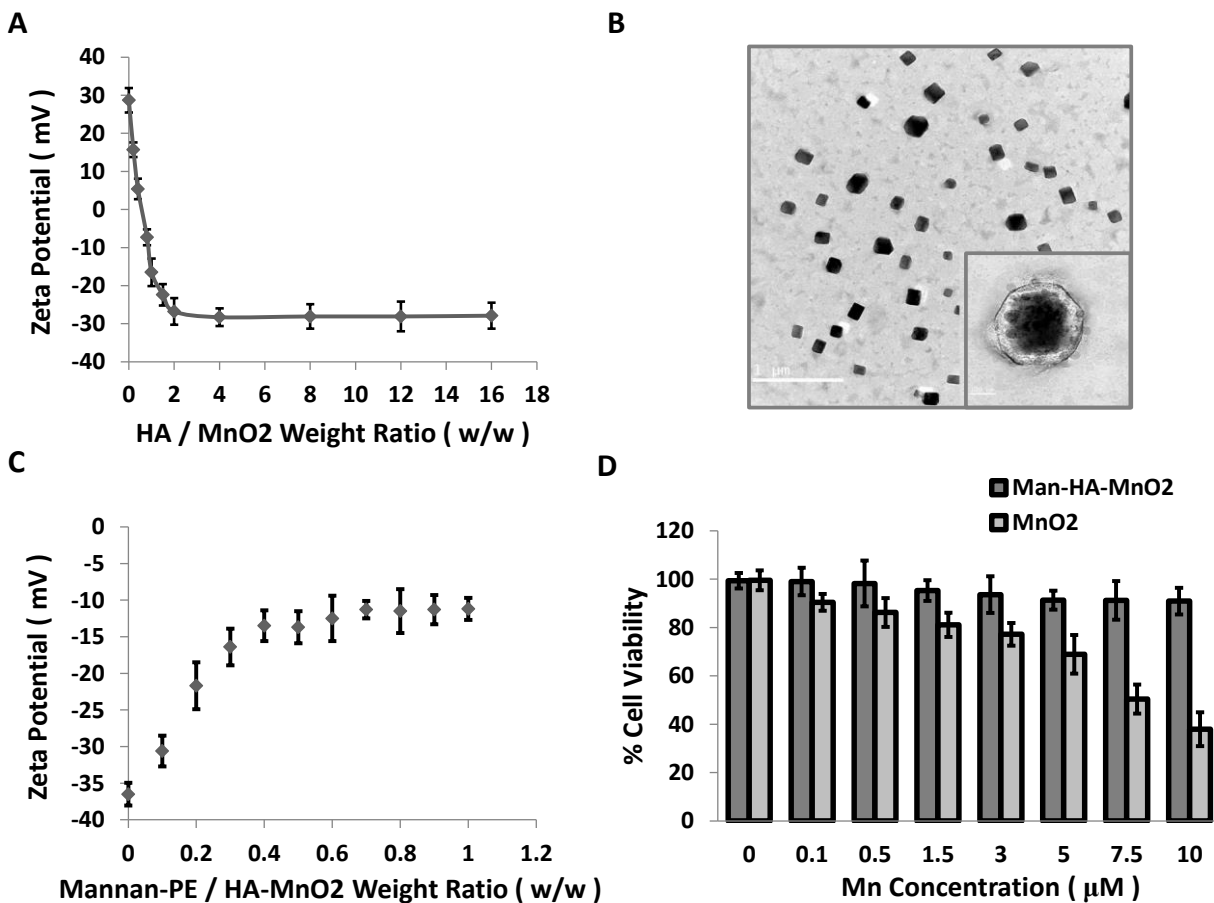

**Figure S1.** Characterization of Man-HA-MnO<sub>2</sub> NPs: (A) Effect of HA conjugation on zeta potential of the NPs at various HA/MnO<sub>2</sub> ratios (w/w). (B) TEM images of Man-HA-MnO<sub>2</sub> NPs. (C) Effect of mannan modification on zeta potential of the NPs at various Mannan-PEs to HA-MnO<sub>2</sub> weight ratios (w/w). (D) Viability of macrophages exposed to various concentrations of Man-HA-MnO<sub>2</sub> NPs and MnO<sub>2</sub> NPs for 4 h (n=3).

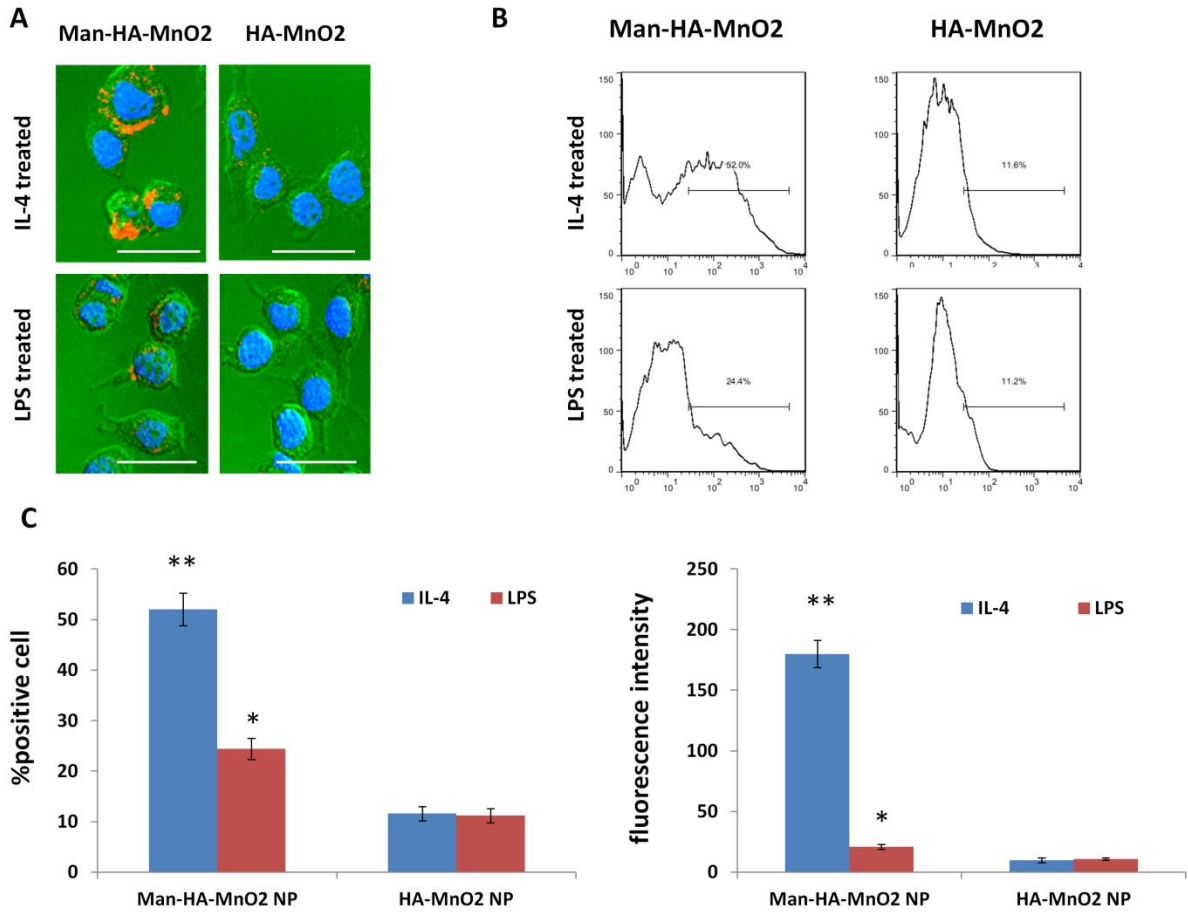

**Figure S2.** Cell binding of Man-HA-MnO<sub>2</sub> NPs: (A) Fluorescence images of cell binding of Man-HA-MnO<sub>2</sub> NPs (red) at 4 °C by M2 macrophages following 1 h incubation with NPs. Scale bar, 100 μm. (B), (C) Flow cytometric analysis of cell binding of Man-HA-MnO<sub>2</sub> NPs at 4 °C by M2 macrophages following 1 h incubation with NPs (n=3). \*\**p* = 0.002 as compared to HA-MnO<sub>2</sub> NPs.

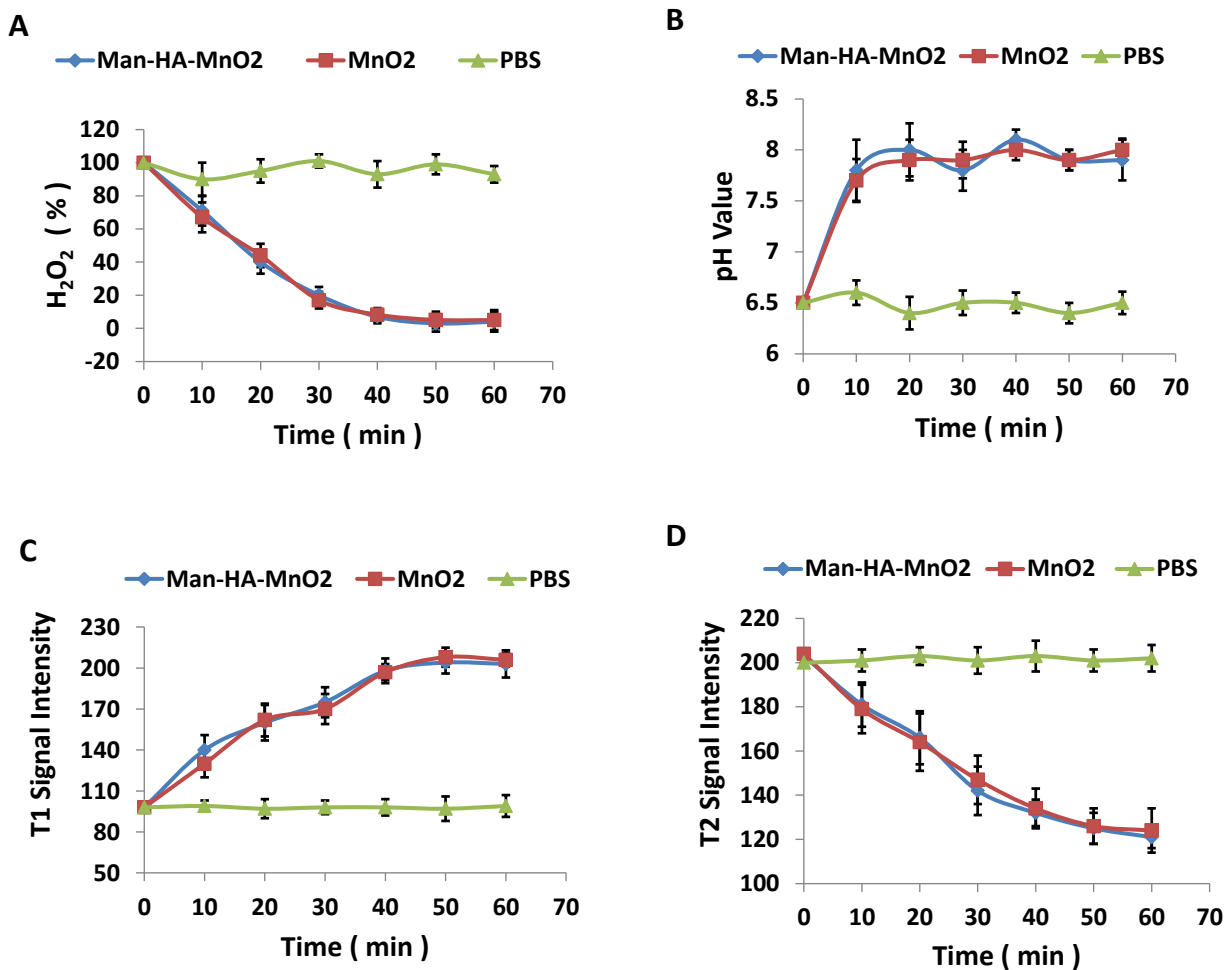

**Figure S3.** Reaction of Man-HA-MnO<sub>2</sub> NPs toward H<sub>2</sub>O<sub>2</sub>: (A) Quenching of H<sub>2</sub>O<sub>2</sub> (300 μM) by Man-HA-MnO<sub>2</sub> NPs (50 μM). (B) pH increase over time by the Man-HA-MnO<sub>2</sub> NPs. (C), (D) Enhancement in T<sub>1</sub>-, T<sub>2</sub>-weighted MR signal vs. time by the Man-HA-MnO<sub>2</sub> NPs (n=3).

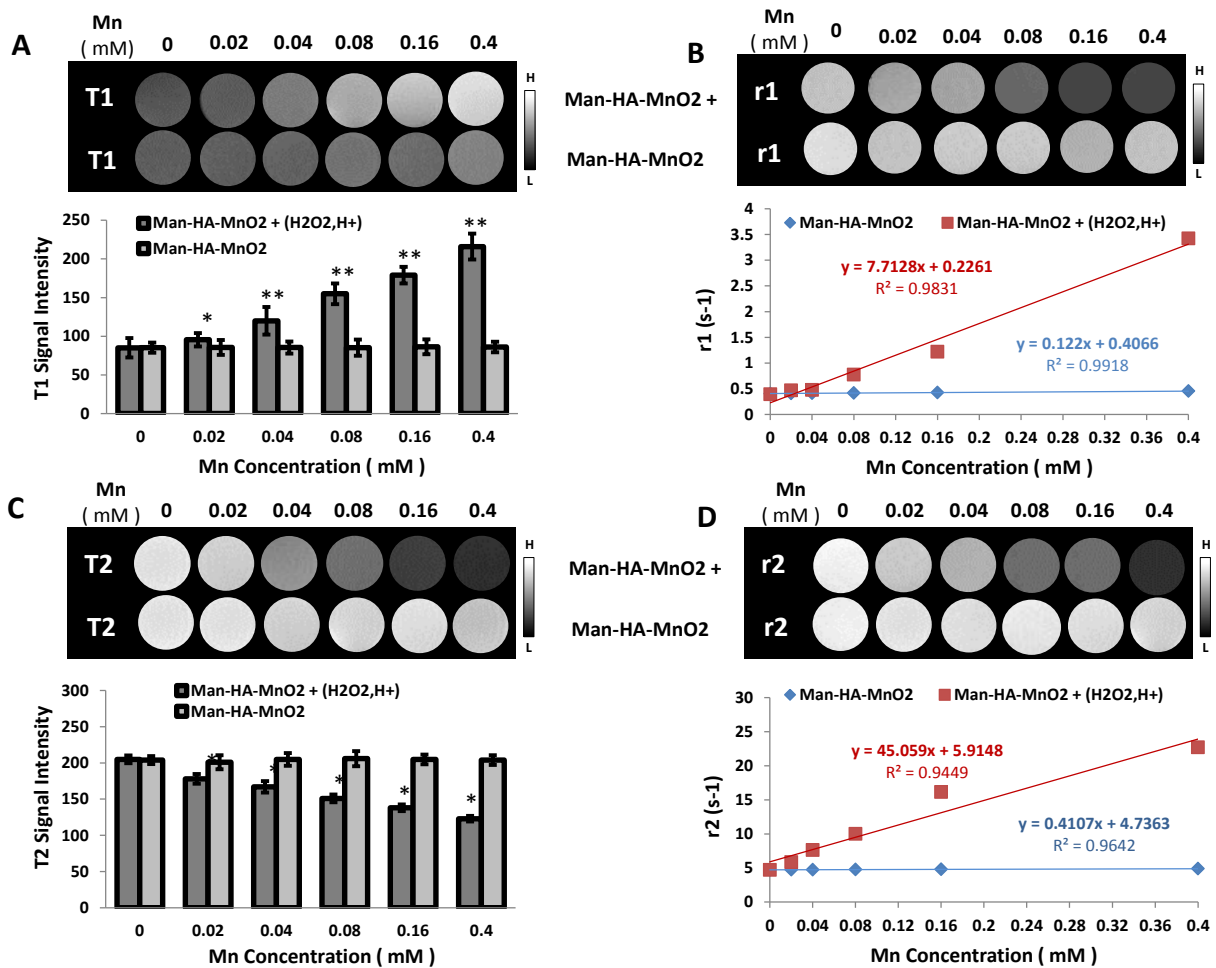

**Figure S4.** The  $T_1$ - (A) and  $T_2$ - (C) weighted MR signals, and  $r_1$  (B) and  $r_2$  (D) relaxivities vs. Mn concentration for Man-HA-MnO<sub>2</sub> NP solution (blue lines) and Man-HA-MnO<sub>2</sub> NP solution treated with H<sub>2</sub>O<sub>2</sub> (red lines).

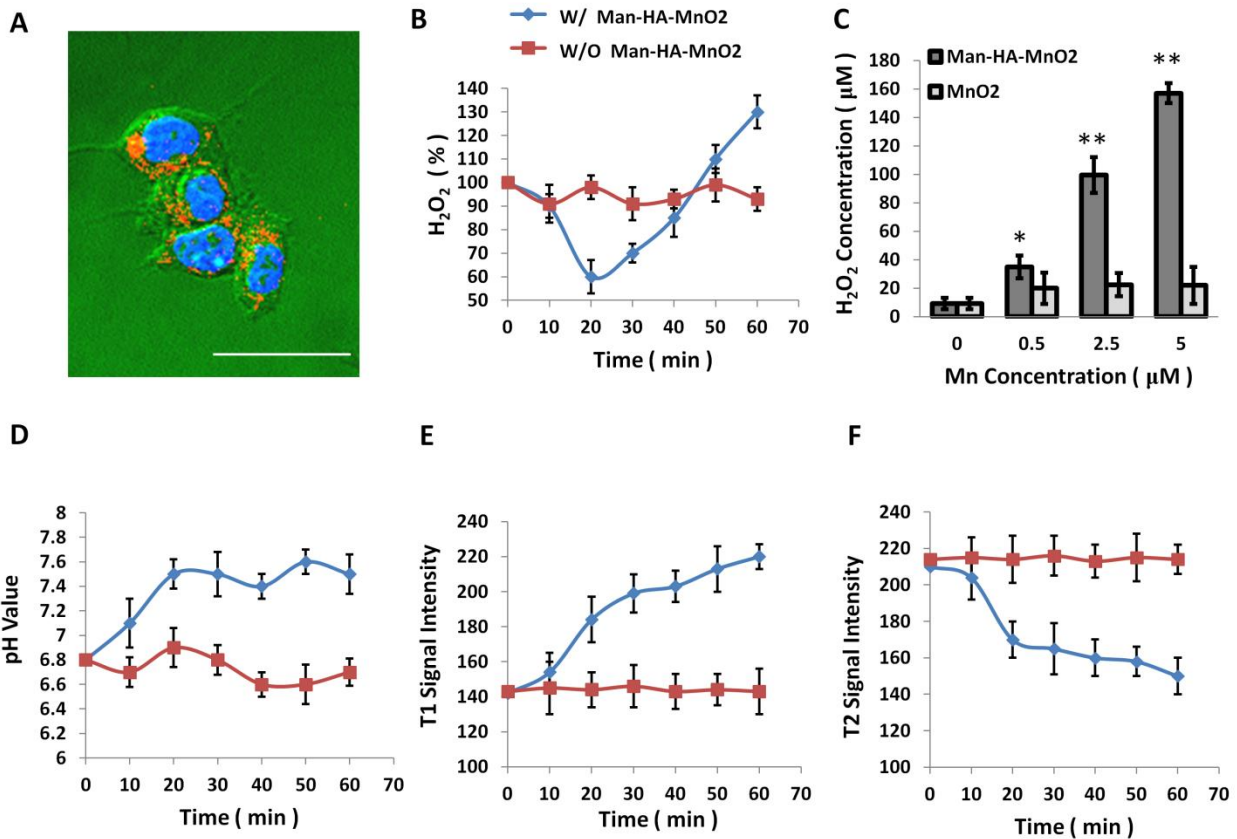

**Figure S5.** Cellular uptake and *in vitro* reactivity of Man-HA-MnO<sub>2</sub> NPs toward H<sub>2</sub>O<sub>2</sub>: (A) Fluorescence image of cellular uptake of Man-HA-MnO<sub>2</sub> NPs (red) at 37 °C by M2 macrophages following 1 h incubation with NPs. Scale bar, 100 μm. (B) Change of cellular H<sub>2</sub>O<sub>2</sub> level over time by Man-HA-MnO<sub>2</sub> NPs incubated with M2 macrophages at pH 6.8 (n = 3). (C) Effect of Man-HA-MnO<sub>2</sub> NPs and MnO<sub>2</sub> NPs on H<sub>2</sub>O<sub>2</sub> release by M2 macrophages after 1 h incubation. (D) Increase in medium pH over time by Man-HA-MnO<sub>2</sub> NPs incubated with M2 macrophages at pH 6.8 (n=3). (E, F) Enhancement in cellular T<sub>1</sub>-, T<sub>2</sub>-weighted MR signals over time by the Man-HA-MnO<sub>2</sub> NPs incubated with M2 macrophages at pH 6.8 (n=3). \**p* < 0.05, \*\**p* < 0.005 in H<sub>2</sub>O<sub>2</sub> level as compared to saline control.

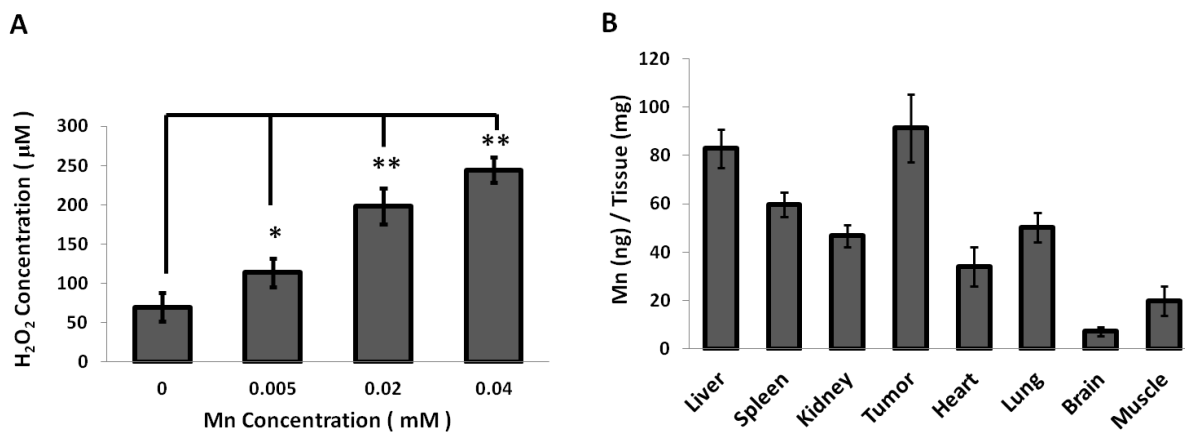

**Figure S6** (A) Effect of Man-HA-MnO<sub>2</sub> NPs on H<sub>2</sub>O<sub>2</sub> level of tumors (n=5/group). Error bars are standard error of the mean. \**p* < 0.05, \*\**p* < 0.005 in H<sub>2</sub>O<sub>2</sub> level as compared to saline control. (B) The biodistribution of Man-HA-MnO<sub>2</sub> NPs. ICP-MS was performed to detect Mn<sup>2+</sup> in the major organs. (n=3/group) Error bars are standard error of the mean.

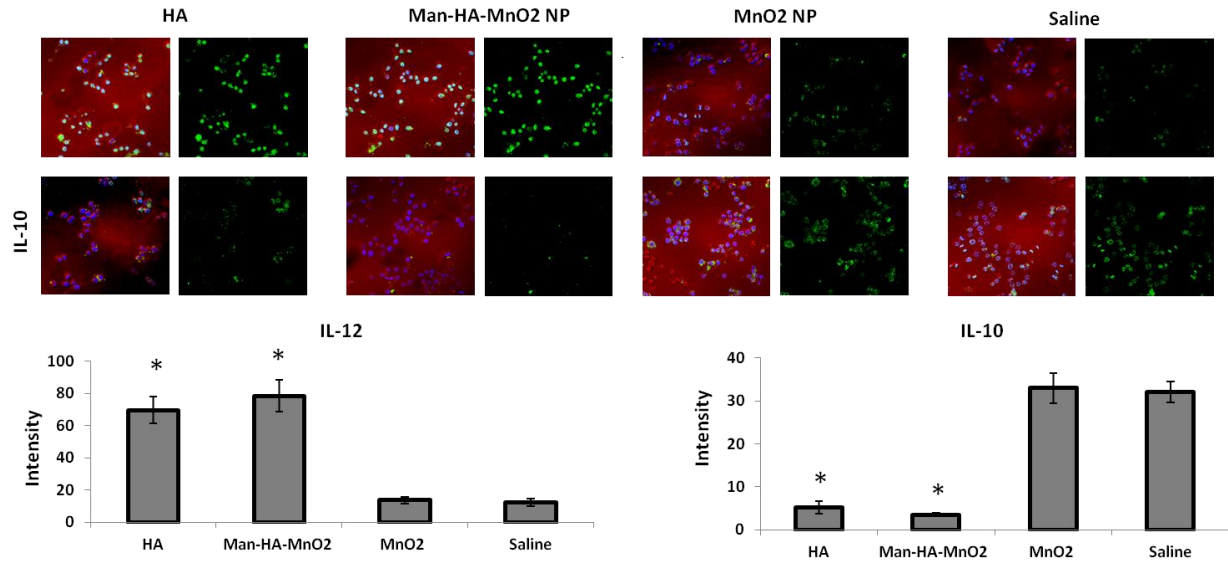

**Figure S7.** Confocal laser scanning microscopy (CLSM) images of M2 macrophages incubated with Man-HA-MnO<sub>2</sub> NPs, MnO<sub>2</sub> NPs or HA. Immunofluorescence staining with IL-10 and IL-12 antibodies was performed to identify the cytokine secretion (green) after M2 macrophages incubated with Man-HA-MnO<sub>2</sub> NPs, MnO<sub>2</sub> NPs or HA. Man-HA-MnO<sub>2</sub> NPs altered the cytokine secretion of M2 macrophages after 1 h incubation (n=3/group). Error bars are standard error of the mean. \*  $p < 0.05$  as compared to saline control.



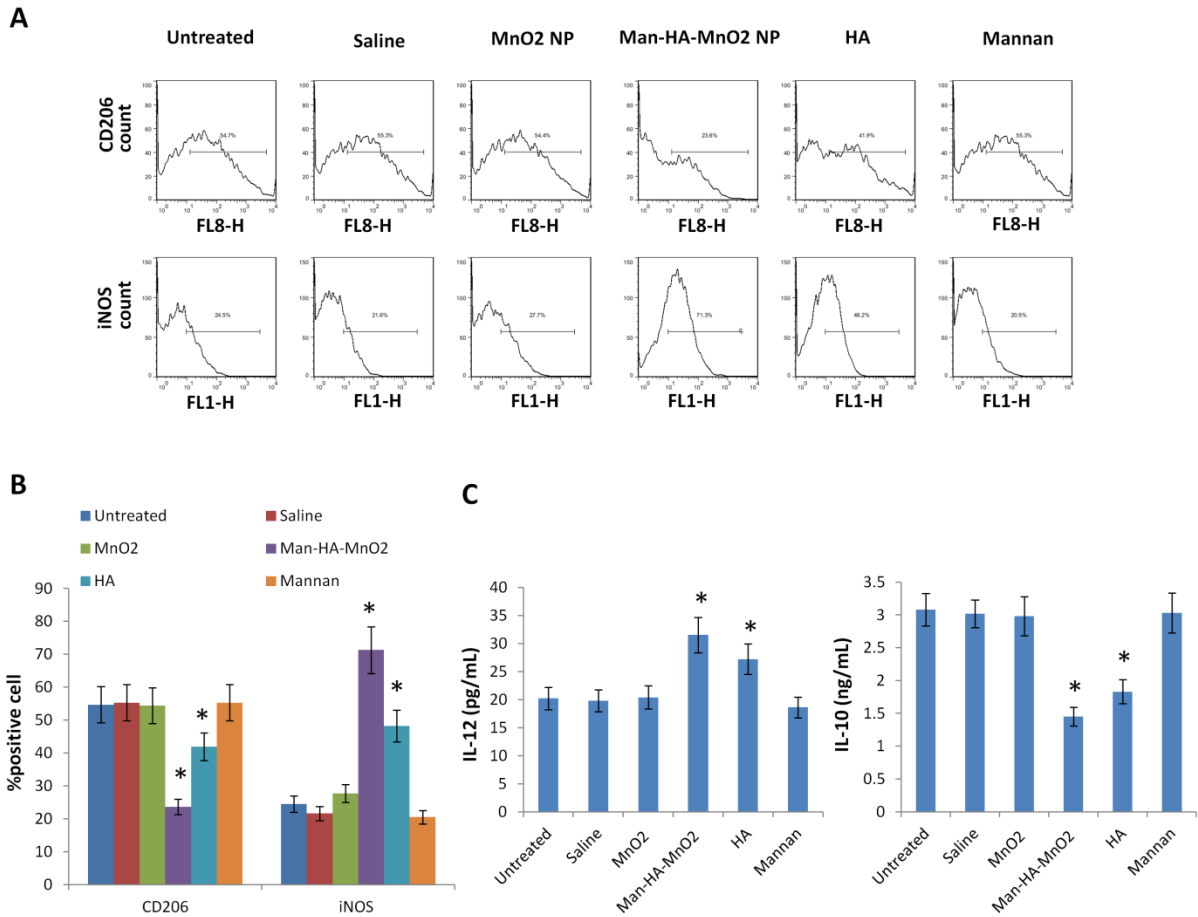

**Figure S8.** Man-HA-MnO<sub>2</sub> NPs prime M2 TAMs towards M1 macrophages: (A, B) Flow cytometric analysis of expression of iNOS (M1 macrophage marker) and CD206 (M2 macrophage marker) after administration of Man-HA-MnO<sub>2</sub> NPs (5  $\mu$ M Mn, 15  $\mu$ M HA), MnO<sub>2</sub> NPs (5  $\mu$ M Mn), HA (15  $\mu$ M) or mannan (3  $\mu$ M). Man-HA-MnO<sub>2</sub> NPs increased expression of iNOS and decreased expression of CD206. (C) Man-HA-MnO<sub>2</sub> NPs altered the cytokine secretion of M2 TAMs measured by ELISA (n=3/group). Error bars are standard error of the mean. \*  $p < 0.05$  as compared to saline control.

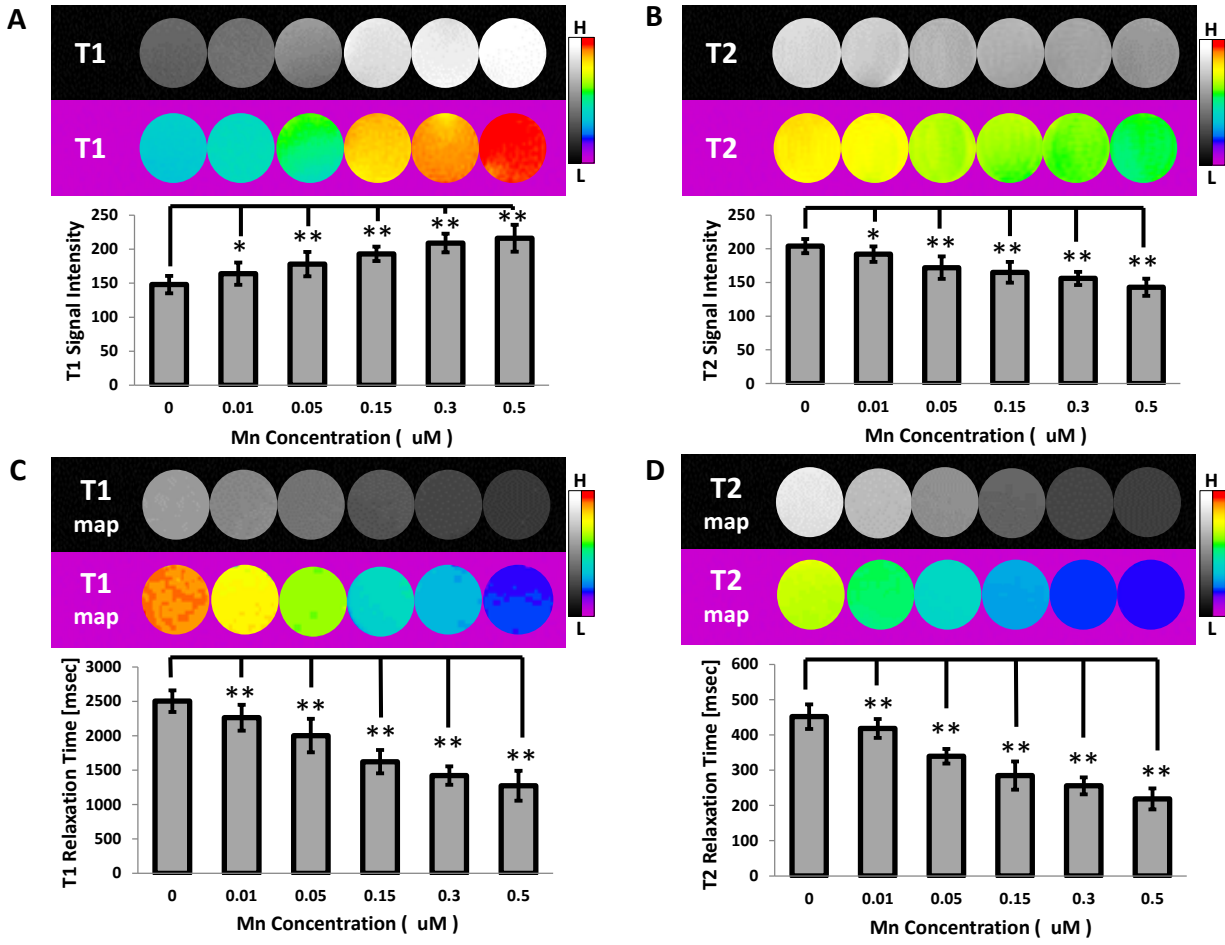

**Figure S9.** The  $T_1$ - and  $T_2$ - weighted MR signal, and  $T_1$  and  $T_2$  relaxation vs. Mn concentration for M2 macrophages incubated with Man-HA-MnO<sub>2</sub> NPs. \* $p < 0.05$ , \*\* $p < 0.005$  as compared to saline control.

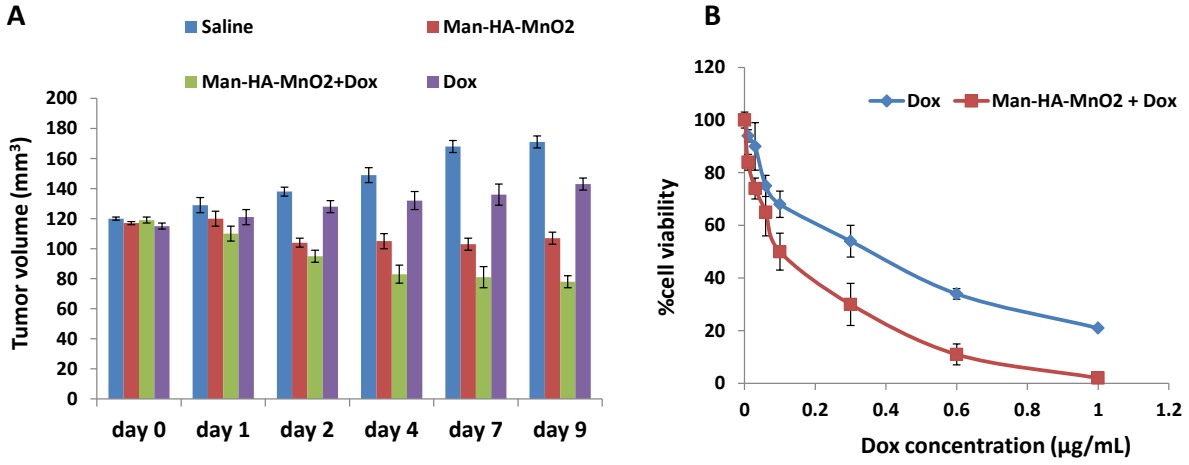

**Figure S10.** Effect on tumor growth and cell viability after treatment with Dox and Man-HA-MnO<sub>2</sub> NPs: (A) Tumor volume measured over time after treatment. (B) Cell viability exposed to various concentrations of Man-HA-MnO<sub>2</sub> NP+Dox or Dox for 24 h (n=3).
